# Supplementary material for: Eyeblink rate watching classical Hollywood and post-classical MTV editing styles, in media and non-media professionals
Source: PubMed Central journal article supplement (PMC5318946; doi:10.1038/srep43267), 2017-02-21
Supplement: srep43267-s2.pdf [file srep43267-s2.pdf]

## **Eyeblink rate watching classical Hollywood and post-classical MTV editing styles, in media and non-media professionals**

Celia Andreu-Sánchez<sup>1\*</sup>, Miguel Ángel Martín-Pascual<sup>1</sup>, Agnès Gruart<sup>2</sup> and José María Delgado-García<sup>2</sup>

<sup>1</sup>Neuro-Com Research Group, Universitat Autònoma de Barcelona, Barcelona, Spain.

<sup>2</sup>Division of Neurosciences, Pablo de Olavide University, Seville, Spain.

**\* Corresponding author**

Dr. Celia Andreu-Sánchez  
Neuro-Com Research Group  
Universitat Autònoma de Barcelona  
Barcelona, Spain  
Phone: 0034 93 581 4463  
E-mail: [celia.andreu@uab.cat](mailto:celia.andreu@uab.cat)

## **Supplementary Information**

**Supplementary Video S1. Stimulus designs for one-shot movie, classical Hollywood-style movie, and modern MTV-style movie.** Fragments of the 3 video stimuli used in this experiment: 20 seconds of the one-shot style movie, 20 seconds of the Hollywood-style movie, and 20 seconds of the MTV-style edited movie.
